# Supplementary material for: Integrated MicroRNA–mRNA Analysis Reveals miR-204 Inhibits Cell Proliferation in Gastric Cancer by Targeting CKS1B, CXCL1 and GPRC5A
Source: MDPI journal article supplement (doi:10.3390/ijms19010087), 2017-12-28
Supplement: s1 [file s1]

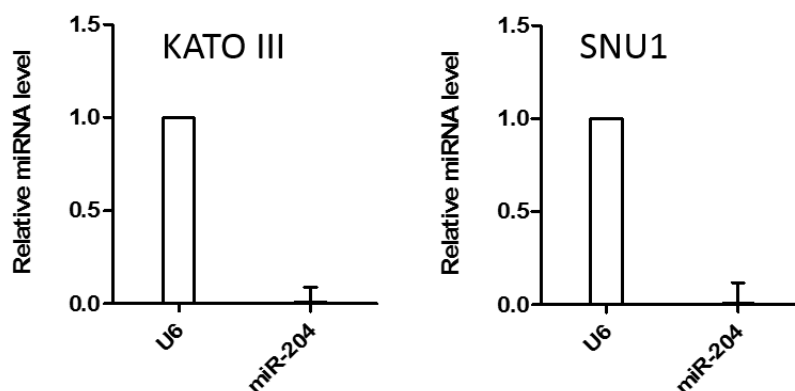

**Supplementary Figure S1.** Relative miR-204 expression in KATO III and SNU1 cell lines. miRNA expression level was normalized to U6 miRNA and calculated from the triplicates data.

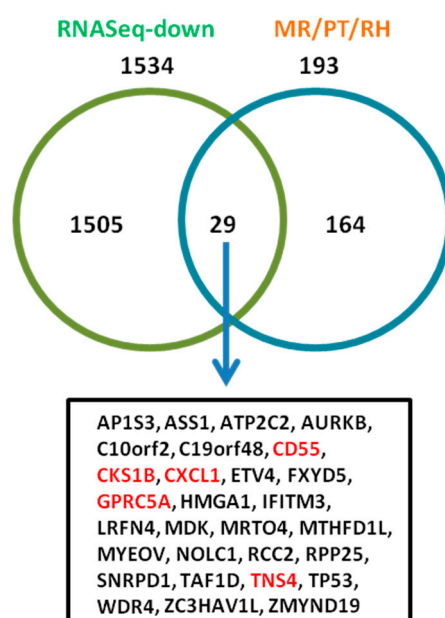

**Supplementary Figure S2.** Venn diagram showing the intersection of genes obtained from RNA-seq analysis that were down-regulated when miR-204 was over-expressed in AGS cells and the target of miR-204 predicted by miRanda, PITA and RNAhybrid.

**Additional file 1: Table S1.** Up-regulated genes in gastric cancer in GPL570. **Table S2.** Down-regulated genes in gastric cancer in GPL570. **Table S3.** Up-regulated genes in gastric cancer in TCGA STAD datasets. **Table S4.** Down-regulated genes in gastric cancer in TCGA STAD datasets. **Table S5.** Differentially expressed genes in gastric cancer that were common in GPL570 and TCGA STAD datasets.

**Additional file 2: Table S1.** Up-regulated miRNAs in gastric cancer in GSE33743. **Table S2.** Down-regulated miRNAs in gastric cancer in GSE33743. **Table S3.** Up-regulated miRNAs in gastric cancer in GSE30070. **Table S4.** Down-regulated miRNAs in gastric cancer in GSE30070. **Table S5.** Up-regulated miRNAs in gastric cancer in GSE23739. **Table S6.** Down-regulated miRNAs in gastric

cancer in GSE23739. **Table S7.** Up-regulated miRNAs in gastric cancer in TCGA STAD datasets. **Table S8.** Down-regulated miRNAs in gastric cancer in TCGA STAD datasets. **Table S9.** Differentially expressed miRNAs in gastric cancer in at least three datasets.

**Additional file 3: Table S1.** Total miRNA target genes interactions from correlation analysis and four target prediction tools. **Table S2.** Total miRNA target genes interactions predicted by miRanda, PITA and RNAhybrid.

**Additional file 4: Table S1.** Gene ontology analysis of miRNA target genes predicted by three prediction tools; miRanda, PITA and RNAhybrid.

**Additional file 5: Table S1.** Up-regulated target genes from RNA-seq when miR-204 was over-expressed. **Table S2.** Down-regulated target genes from RNA-seq when miR-204 was over-expressed.

**Additional file 6: Table S1.** miR-204-5p targets in miRTarBase.
